# Supplementary material for: Valorization of waste coffee grounds into microporous carbon materials for CO2 adsorption
Source: Royal Society of Chemistry journal article supplement (doi:10.1039/d3gc03557c), 2023-10-11
Supplement: d3gc03557c1.pdf [file d3gc03557c1.pdf]

## Supplementary information

Valorization of waste coffee grounds into microporous carbon materials for  
CO<sub>2</sub> adsorption

Choong-Hee Kim, Seul-Yi Lee\*, and Soo-Jin Park\*

*\*Department of Chemistry, Inha University, 100 Inharo, Incheon 22212, South Korea*

\* Corresponding author.

*E-mail address: [sjpark@inha.ac.kr](mailto:sjpark@inha.ac.kr) (S. -J. Park), [leesy@inha.ac.kr](mailto:leesy@inha.ac.kr) (S. -Y. Lee)*

## Adsorption Kinetics study

Adsorption kinetics, cyclic stability, and facile regeneration are equally important factors for high CO<sub>2</sub> adsorption capacity. To evaluate the adsorption kinetics, here we have measured time-dependent CO<sub>2</sub> adsorption isotherms of CAC3 using TGA at various temperatures 303, 313, and 323 K under atmospheric pressure (see manuscript). The experimental data were fitted by pseudo-first-order and pseudo-second-order models. Both models explain adsorption rate where pseudo-first-order depends upon the number of adsorption sites (**Eq. S1**) while pseudo-second-order assumes the square of the number of adsorption sites (**Eq. S2**).

$$q_t = q_e(1 - e^{-k_1 t}) \quad (S1)$$

$$q_t = \frac{1}{\frac{1}{k_2 q_e^2 t} + \frac{1}{q_e}} \quad (S2)$$

here,  $q_e$  and  $q_t$  denote adsorption uptakes at equilibrium and time “ $t$ ”, respectively. Additionally,  $k_1$  and  $k_2$  denote adsorption rate constants obtained by fitting the experimental data, with pseudo-first and pseudo-second order, respectively. Notably, pseudo-first-order best fits the experimental data with  $R^2 > 0.99$  at all temperatures, compared to pseudo second-order, which further indicate the physical adsorption mechanism of CO<sub>2</sub> capture [1, 2]. Additionally, the activation energy was also determined using the following **Eq. S3**.

$$k_1 = A \exp\left(-\frac{E_a}{RT}\right) \quad (S3)$$

here “ $A$ ” is Arrhenius' exponential factor, “ $E_a$ ” is the activation energy, “ $R$ ” is the universal gas constant, and “ $T$ ” represents absolute temperature. A linear fitting graph between the natural log of  $k_1$  and inverse of temperature (*i.e.*,  $1/T$ ) was drawn (see manuscript). The activation energy based on obtained fitted parameters was calculated to be 5.36 kJ mol<sup>-1</sup>, revealing the CO<sub>2</sub> adsorption mechanism predominantly physisorption [3].

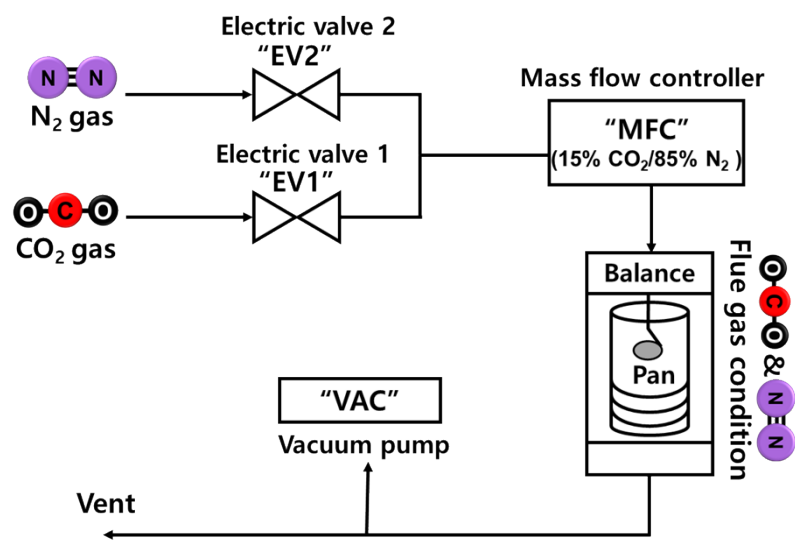

**Fig. S1.** Experimental setup of the binary mixture gas adsorption (gravimetric analysis) and cycling measurements

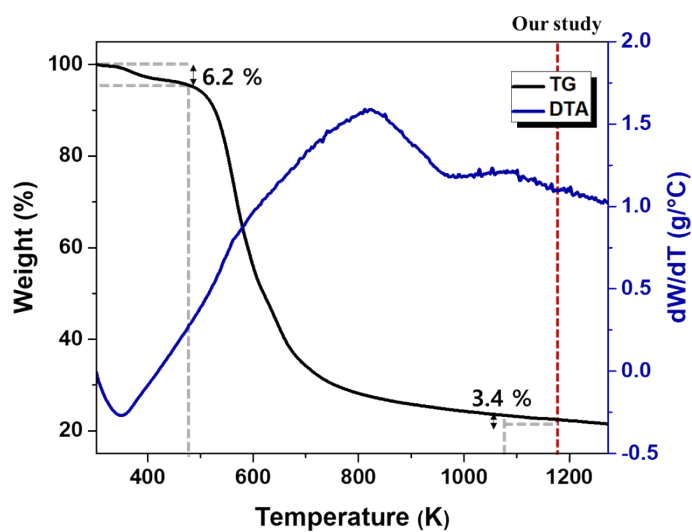

**Fig. S2.** TG-DTA curve for coffee grounds under nitrogen atmosphere

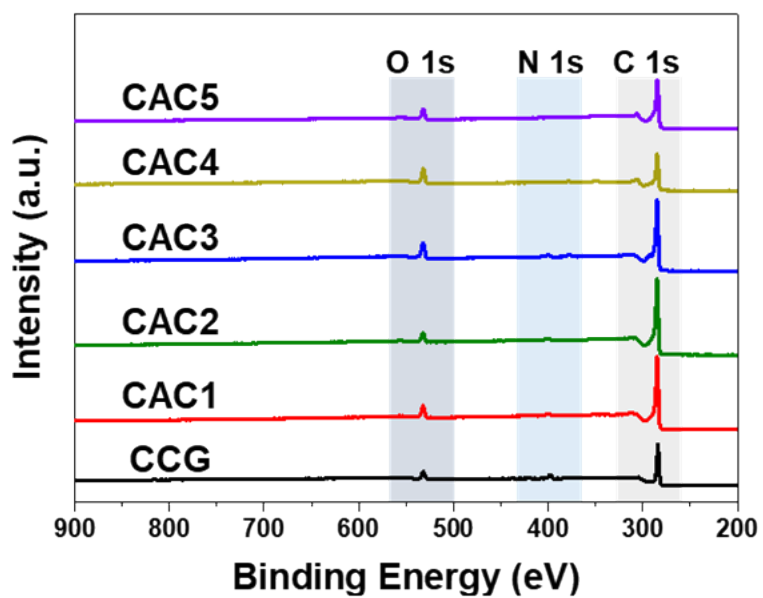

Fig. S3 XPS survey scan for all samples.

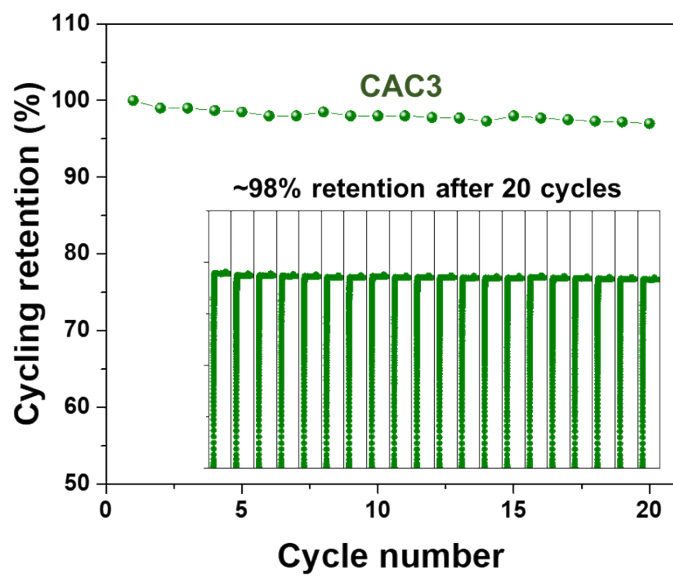

Fig. S4 Flue gas condition 20 cycle retention

**Table S1.** The initial isosteric heat of CO<sub>2</sub> adsorption of CCG and CAC samples.

| Samples | Initial isosteric heat of adsorption<br>(kJ/mol) |
|---------|--------------------------------------------------|
| CAC1    | 27.4                                             |
| CAC2    | 30.6                                             |
| CAC3    | 34.4                                             |
| CAC4    | 30.0                                             |
| CAC5    | 25.6                                             |

**Table S2.** Comparisons of biomass-derived activated carbons and their performance in CO<sub>2</sub> uptakes

| Samples                                      | Biomass Precursor | Activating agents                            | Activation conditions |          | Specific surface area (m <sup>2</sup> g <sup>-1</sup> ) | CO <sub>2</sub> uptakes at 273 K/1 bar (mmol g <sup>-1</sup> ) | References |
|----------------------------------------------|-------------------|----------------------------------------------|-----------------------|----------|---------------------------------------------------------|----------------------------------------------------------------|------------|
|                                              |                   |                                              | Temp. (K)             | Time (h) |                                                         |                                                                |            |
| CAC3                                         | Coffee waste      | K <sub>2</sub> C <sub>2</sub> O <sub>4</sub> | 1173                  | 1        | 1714                                                    | 6.91                                                           | This work  |
| SM10                                         | Sucrose/          | K <sub>2</sub> C <sub>2</sub> O <sub>4</sub> | 1073                  | 1        | 3318                                                    | 6.0                                                            | [4]        |
| K <sub>2</sub> C <sub>2</sub> O <sub>4</sub> | Melamine          |                                              |                       |          |                                                         |                                                                |            |
| STO                                          | Corn starch       | K <sub>2</sub> C <sub>2</sub> O <sub>4</sub> | 1073                  | 2        | 1747                                                    | 6.12                                                           | [5]        |
| 300-6-                                       | Pecan             | K <sub>2</sub> CO <sub>3</sub>               | 648                   | 6        | 842                                                     | 3.3                                                            | [6]        |
| K <sub>2</sub> CO <sub>3</sub>               | nutshell          |                                              |                       |          |                                                         |                                                                |            |
| H250-800                                     | Lotus stalk       | KOH                                          | 1073                  | 2        | 2510                                                    | 3.42                                                           | [7]        |
| K3-PDC1                                      | Bee pollen        | KOH                                          | 1073                  | 2        | 1460                                                    | 3.71                                                           | [8]        |
| CPC-CA-SE/ACs                                | Pine cone         | KOH                                          | 873                   | 1        | 1786                                                    | 6.57                                                           | [9]        |

**Table. S3** The kinetic parameters for CAC3 samples based on CO<sub>2</sub> adsorption data fitting

using psuedo first-order and pseudo second-order models at 303, 313, and 323 K.

| Samples | Temperature<br>(K) | Psuedo first-order         |         | Psuedo second-order                             |         |
|---------|--------------------|----------------------------|---------|-------------------------------------------------|---------|
|         |                    | $K_1$ (min <sup>-1</sup> ) | $R^2$   | $K_2$ (mmol g <sup>-1</sup> min <sup>-1</sup> ) | $R^2$   |
| CAC3    | 303                | 1.59                       | 0.99624 | 2.06                                            | 0.88603 |
|         | 313                | 1.71                       | 0.99132 | 2.39                                            | 0.86849 |
|         | 323                | 1.81                       | 0.99712 | 3.02                                            | 0.90115 |

## Reference

- [1] S.-M. Hong, E. Jang, A.D. Dysart, V.G. Pol, K.B. Lee, CO<sub>2</sub> capture in the sustainable wheat-derived activated microporous carbon compartments, *Scientific reports* 6(1) (2016) 1-10.
- [2] G. Nazir, A. Rehman, S.-J. Park, Self-activated, urea modified microporous carbon cryogels for high-performance CO<sub>2</sub> capture and separation, *Carbon* 192 (2022) 14-29.
- [3] A.E. Creamer, B. Gao, M. Zhang, Carbon dioxide capture using biochar produced from sugarcane bagasse and hickory wood, *Chemical Engineering Journal* 249 (2014) 174-179.
- [4] J.V. Guerrero, J.N. Burrow, J.E. Eichler, M.Z. Rahman, M.V. Namireddy, K.A. Friedman, S.S. Coffman, D.C. Calabro, C.B. Mullins, Evaluation of Two Potassium-Based Activation Agents for the Production of Oxygen- and Nitrogen-Doped Porous Carbons, *Energy & Fuels* 34(5) (2020) 6101-6112. <https://doi.org/10.1021/acs.energyfuels.0c00427>.
- [5] G. Nazir, A. Rehman, S.-J. Park, Role of heteroatoms (nitrogen and sulfur)-dual doped corn-starch based porous carbons for selective CO<sub>2</sub> adsorption and separation, *Journal of CO<sub>2</sub> utilization* 51 (2021) 101641.
- [6] G. Duran-Jimenez, L.A. Stevens, E.T. Kostas, V. Hernandez-Montoya, J.P. Robinson, E.R. Binner, Rapid, simple and sustainable synthesis of ultra-microporous carbons with high performance for CO<sub>2</sub> uptake, via microwave heating, *Chemical Engineering Journal* 388 (2020). <https://doi.org/ARTN 124309> 10.1016/j.cej.2020.124309.
- [7] G.K. Parshetti, S. Chowdhury, R. Balasubramanian, Biomass derived low-cost microporous adsorbents for efficient CO<sub>2</sub> capture, *Fuel* 148 (2015) 246-254. <https://doi.org/10.1016/j.fuel.2015.01.032>.
- [8] S.W. Choi, J.L. Tang, V.G. Pol, K.B. Lee, Pollen-derived porous carbon by KOH activation: Effect of physicochemical structure on CO<sub>2</sub> adsorption, *Journal of Co<sub>2</sub> Utilization* 29 (2019) 146-155. <https://doi.org/10.1016/j.jcou.2018.12.005>.
- [9] C.H. Kim, S.Y. Lee, S.J. Park, Efficient micropore sizes for carbon dioxide physisorption of pine cone-based carbonaceous materials at different temperatures, *Journal of Co<sub>2</sub> Utilization* 54 (2021). <https://doi.org/ARTN 101770> 10.1016/j.jcou.2021.101770.
